# Supplementary material for: Quantification of Enhydrin and Uvedalin in the Ethanolic Extract of Smallanthus sonchifolius Leaves Validated by the HPLC Method
Source: MDPI journal article supplement (doi:10.3390/molecules28041913), 2023-02-17
Supplement: s1 [file s1]

SUPPLEMENTARY

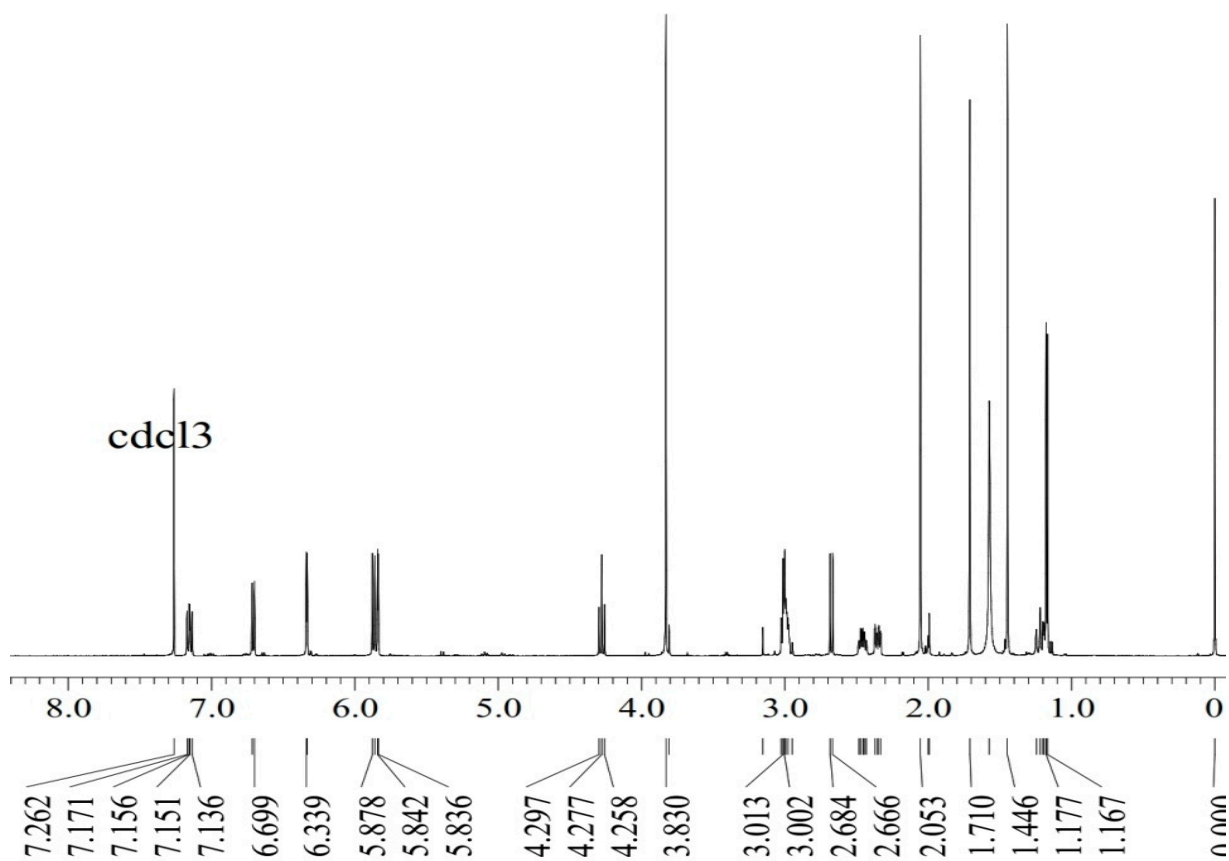

**Figure S1.**  $^1\text{H}$ -NMR Spectra of (**1**) (500 MHz in  $\text{CDCl}_3$ )

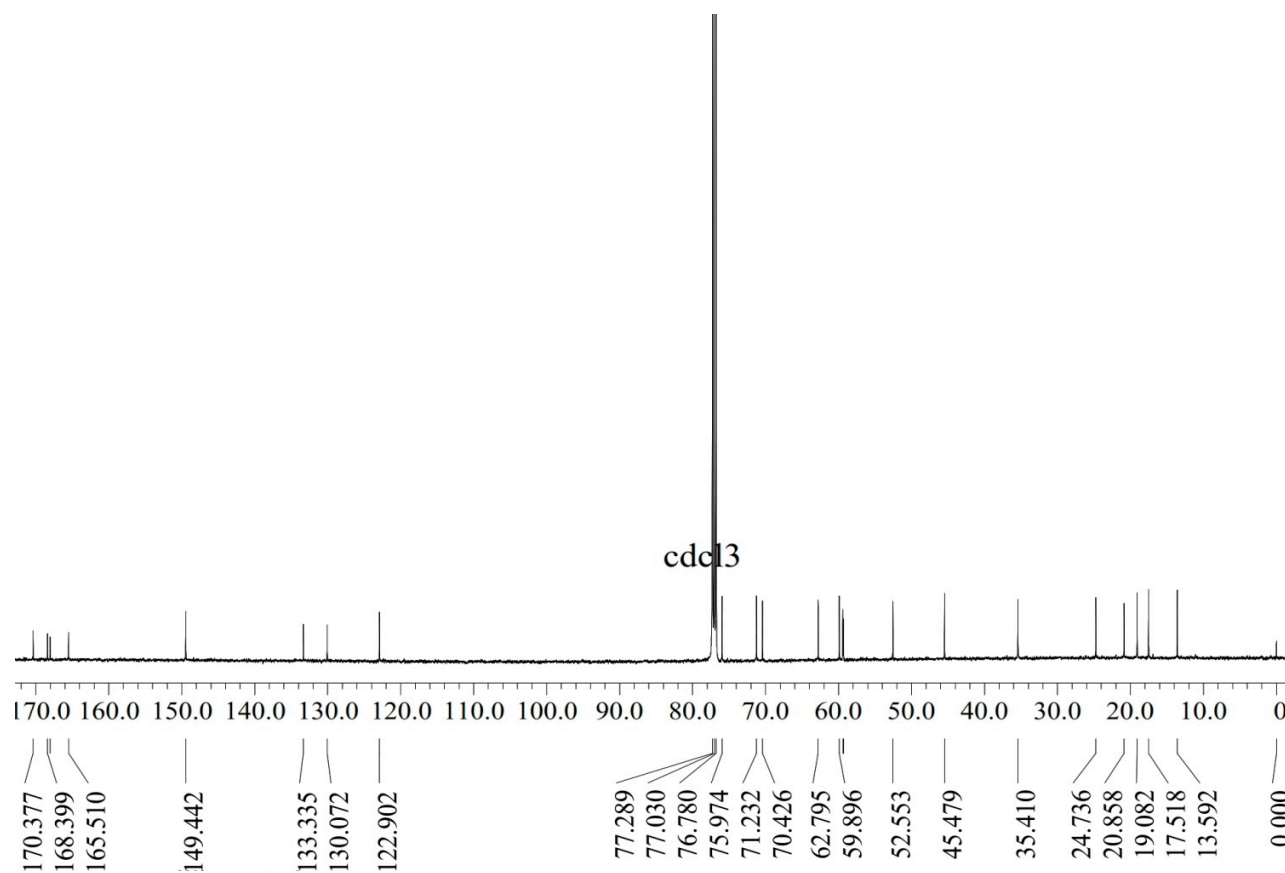

**Figure S2.**  $^{13}\text{C}$ -NMR Spectra of (1) (500 MHz in  $\text{CDCl}_3$ )

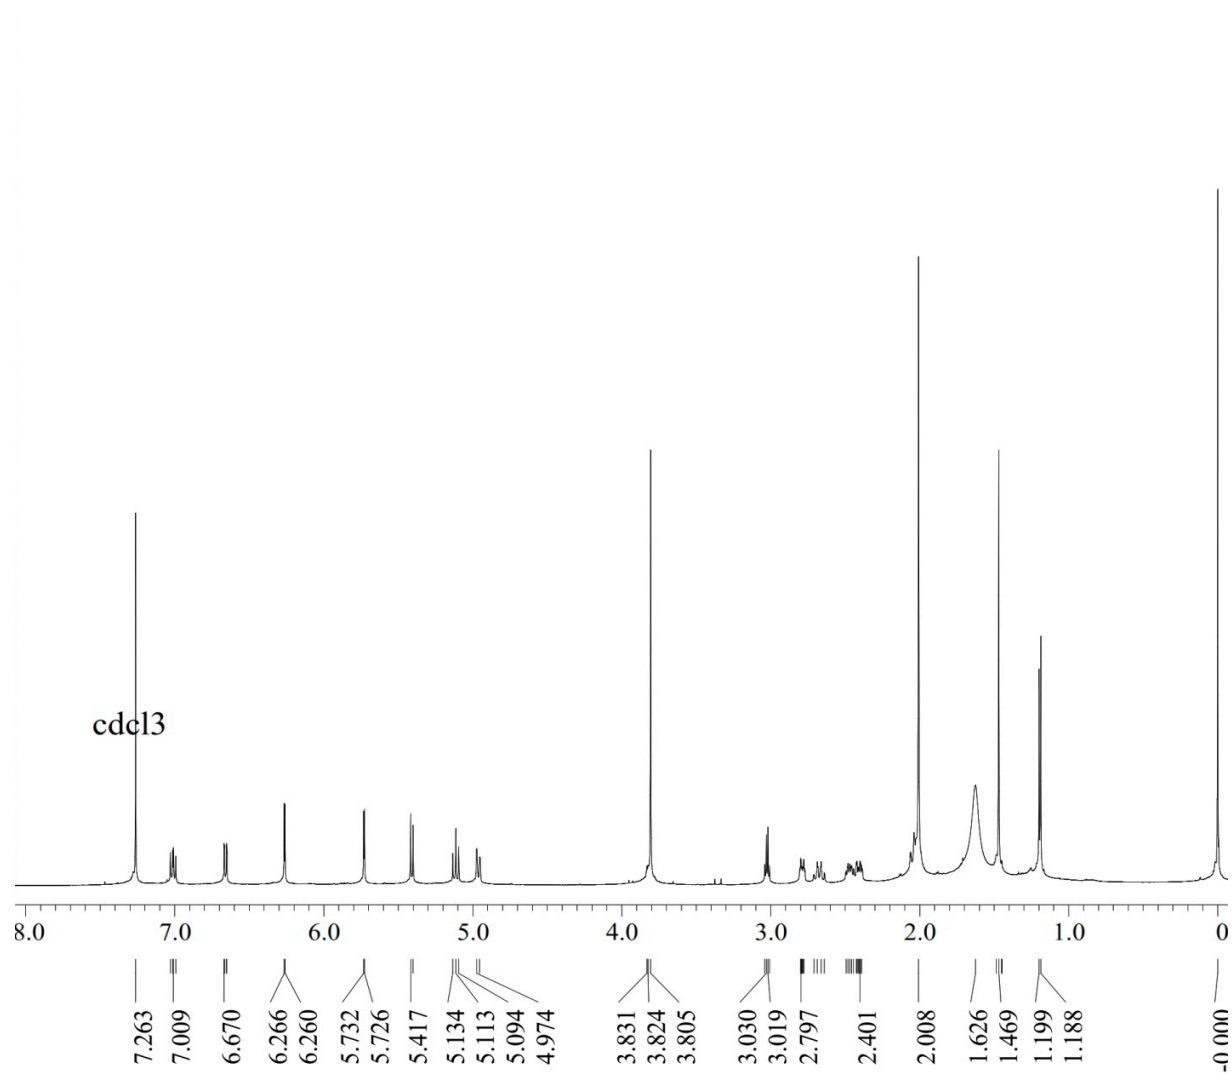

**Figure S3.** <sup>1</sup>H-NMR Spectra of (2) (500 MHz in CDCl<sub>3</sub>)

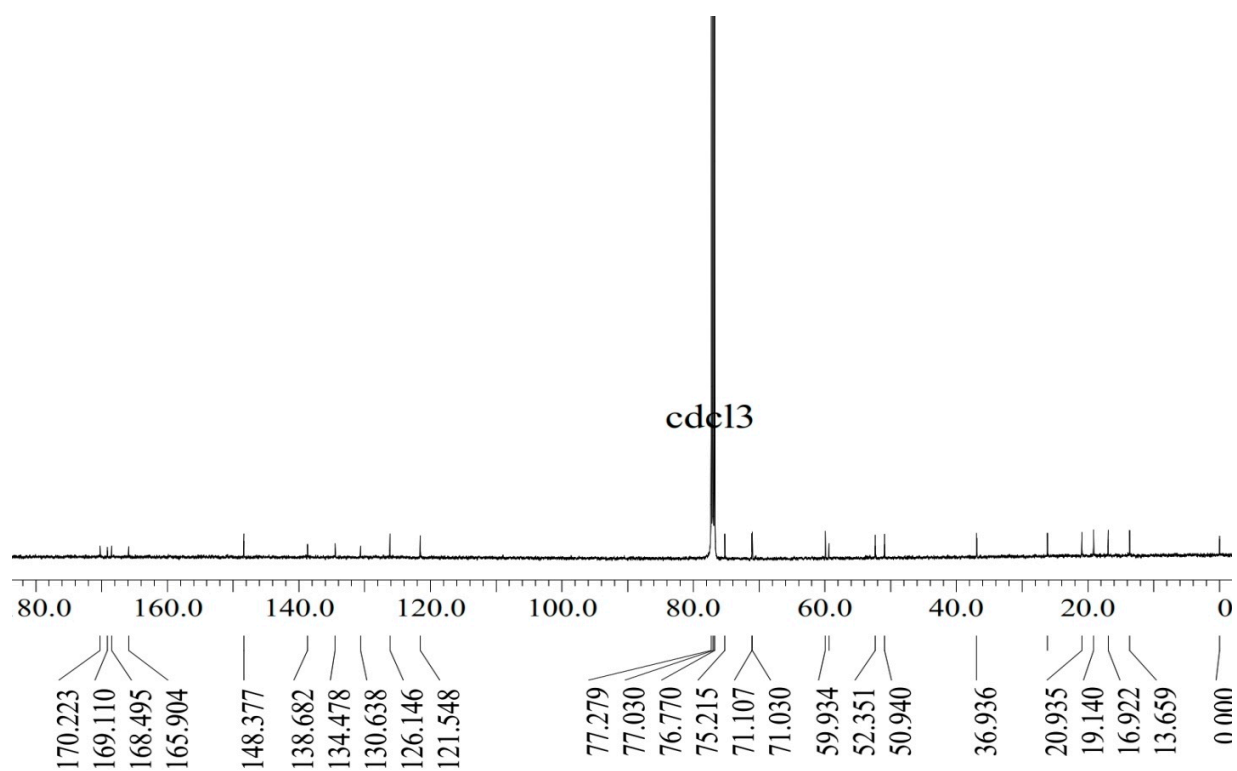

**Figure S4.** <sup>13</sup>C-NMR Spectra of (2) (500 MHz in CDCl<sub>3</sub>)

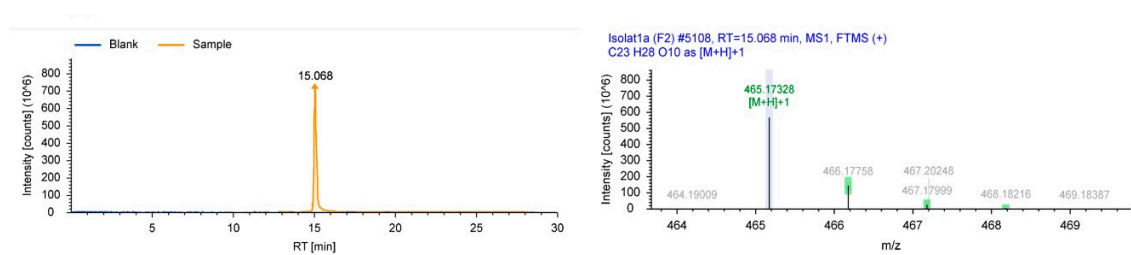

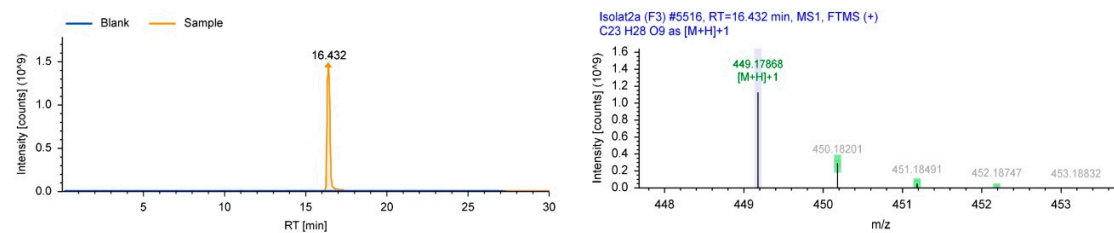

**Figure S6.** LC-MS Spectra of (2)
